# Supplementary material for: Photoactivated covalent metal–organic frameworks with dual functionalities for efficient colorimetric sensing and aerobic oxidation reaction
Source: Royal Society of Chemistry journal article supplement (doi:10.1039/d5ta04000k), 2025-01-01
Supplement: d5ta04000k1.pdf [file d5ta04000k1.pdf]

## Supporting Information for

# Photoactivated Covalent Metal-Organic Frameworks with Dual Functionalities for efficient Colorimetric Sensing and Aerobic Oxidation Reaction

*Jiani Yang,<sup>1</sup> Chao Xiong,<sup>1</sup> Mi Zhou,<sup>1</sup> Xianglin Luo,<sup>1</sup> Xikui Liu,<sup>1</sup> Chong Cheng,<sup>1</sup> Chao He,<sup>1,\*</sup> and Xiaohui Xu<sup>1,2,\*</sup>*

<sup>1</sup> Department of Medical Ultrasound, College of Polymer Science and Engineering, National Key Laboratory of Advanced Polymer Materials, West China Hospital, Sichuan University, Chengdu 610041, China

<sup>2</sup> Frontiers Science Center for Disease-Related Molecular Network, West China Hospital, Sichuan University, Chengdu 610041, China

\* Corresponding to: [hec918@scu.edu.cn](mailto:hec918@scu.edu.cn) (C. He) and [xiaohuixu@scu.edu.cn](mailto:xiaohuixu@scu.edu.cn) (X. Xu)

## Experimental Sections

### 1. Synthesis of $\text{Ag}_3\text{L}_3$ metal clusters

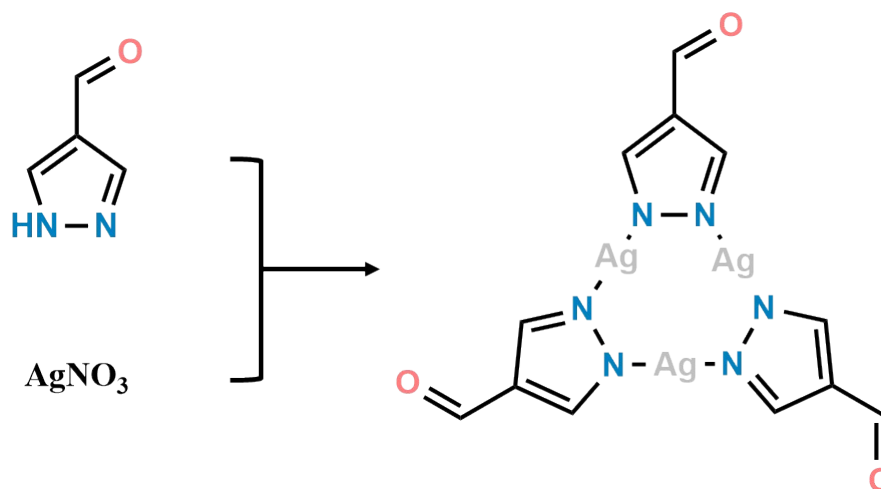

$\text{Ag}_3\text{L}_3$  was synthesized according to previously reported procedures<sup>1</sup>. A mixture of the ligand 1H-pyrazole-4-carbaldehyde (HL) (96 mg, 1.0 mmol),  $\text{AgNO}_3$  (170 mg, 1.0 mmol), 30 mL acetonitrile, and 0.4 mL triethylamine was added into a 50 mL glass bottle. Then, the resulting mixture was stirred for 4 hours in the dark. Afterward, the resulting residue was washed with acetonitrile and absolute ethanol and filtered to give white powders (218.92 mg, yield:82.3%).

### 2. Synthesis of $\text{Cu}_3\text{L}_3$ metal clusters

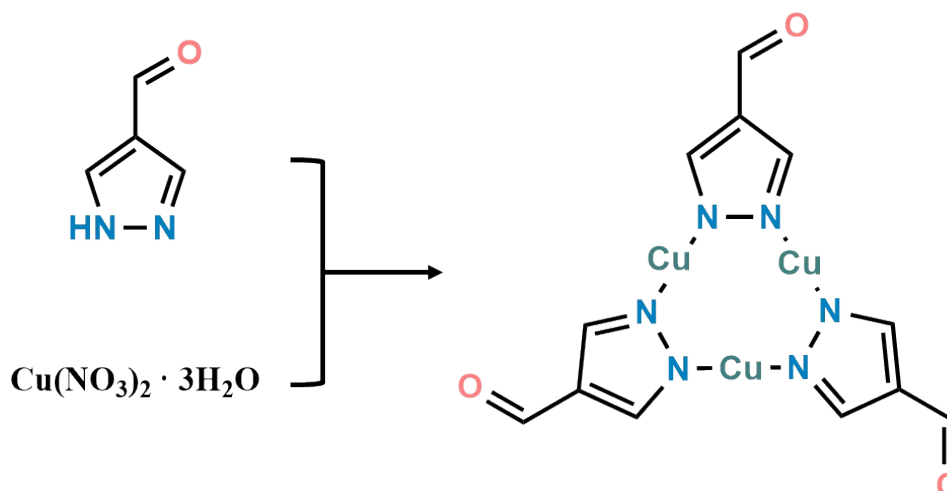

$\text{Cu}_3\text{L}_3$  was synthesized according to previously reported procedures<sup>2</sup>.  $\text{Cu}(\text{NO}_3)_2 \cdot 3\text{H}_2\text{O}$  (200 mg, 0.83

mmol) and HL (96 mg, 1.0 mmol) were dissolved in a mixture of 6.7 mL DMF, 5.0 mL H<sub>2</sub>O, and 6.7 mL ethanol in a 25 mL vial. The tightly capped vial was placed in an oven at 100 °C for 12 h, and light yellow single crystals were obtained. The crystals were collected and immersed in H<sub>2</sub>O for 3 days, during which time H<sub>2</sub>O was exchanged three times per day. Afterward, the crystals were quickly washed with acetone three times, followed by drying under vacuum at 120 °C for 24 h (230.58 mg, yield:77.9%).

### 3. Stability Test

CMOFs were immersed in NaOAc-HOAc buffer (pH = 4), DMF, EtOH, THF and acetonitrile (ACN) for 12 h, respectively. The mixture was then filtered and washed with methanol and dried under vacuum at 60 °C. Then, the PXRD patterns were collected.

### 4. Photoelectrochemical measurements

All the electrochemical measurements were carried out in a conventional three-electrode cell using the Gamry reference 600 workstations (Gamry, USA) at room temperature. Mott Schottky, photocurrent, and Electrochemical Impedance Spectroscopy (EIS) were tested in Na<sub>2</sub>SO<sub>4</sub> solution (0.5 M, pH 7). The working electrode is an Indium-Tin Oxide (ITO) glass plate coated with catalyst slurry; the counter electrode is platinum foil, and saturated Ag/AgCl is the reference electrode. Mott Schottky plots were measured at alternating current (AC) frequencies of 500 Hz, 1000 Hz, and 1500 Hz. Working electrode preparation: 10 mg of catalyst, 1 mL of ethanol, and 10 µL of Nafion were mixed and sonicated for 20 min. 50 µL of slurry was deposited evenly on the ITO glass plate (1 × 1 cm<sup>2</sup>), which was dried under infrared irradiation.

## 5. Oxidase-like activity of Tbpa-Ag<sub>3</sub> and Tbpa-Cu<sub>3</sub> under darkness or light irradiation

The catalytic activity of two CMOFs was evaluated by catalytic oxidation of TMB. Typically, under darkness, 20  $\mu\text{L}$  of Tbpa-Ag<sub>3</sub> or Tbpa-Cu<sub>3</sub> (10 mg mL<sup>-1</sup>) was added firstly into 1955  $\mu\text{L}$  of 0.2 M HAc-NaAc buffer solution (pH 4.0), containing 25  $\mu\text{L}$  of TMB (10 mg·mL<sup>-1</sup> in DMSO). Then, the test was started quickly at room temperature. After the 5 min incubation at 25 °C, the oxidase-like activity was measured by monitoring the absorbance at 652 nm for the oxTMB after centrifugation. Oxidase-like activity of Tbpa-Ag<sub>3</sub> and Tbpa-Cu<sub>3</sub> was measured under the same conditions as above, with the only difference being that the incubation was performed under a Xenon lamp ( $\lambda \geq 420$  nm, 100 mW/cm<sup>2</sup>).

## 6. Steady-state enzyme dynamic parameters

The Michaelis-Menten constant was calculated based on the Michaelis-Menten saturation curve. For each TMB or H<sub>2</sub>O<sub>2</sub> concentration, the initial reaction rates ( $V_0$ ) were calculated from the absorbance variation using the Beer-Lambert Law (Equation (1)). The reaction rates were then plotted against their corresponding TMB concentration and then fitted with the Michaelis–Menten curves (Equation (2)). Furthermore, a linear double-reciprocal plot (Lineweaver–Burk plot, Equation (3)) was used to determine the maximum reaction velocity ( $V_{\max}$ ) and Michaelis constant ( $K_m$ ).

$$A = \varepsilon lc \quad (1)$$

Where,  $\varepsilon$  is 39,000 M<sup>-1</sup> cm<sup>-1</sup> for oxTMB,  $c$  indicates the oxTMB concentration, and  $l$  is the length of the solution in the light path.

$$V_0 = \frac{V_{\max} * [S]}{K_m + [S]} \quad (2)$$

$$\frac{1}{V_0} = \frac{K_m}{V_{max}} \cdot \frac{1}{[S]} + \frac{1}{V_{max}} \quad (3)$$

Where, [S] is the concentration of TMB.

## 7. Colorimetric detection of L-Cys and GSH

For the sensing procedure, 20  $\mu\text{L}$  of Tbpa- $\text{Ag}_3$  (10  $\text{mg mL}^{-1}$ ) was added firstly into 1955  $\mu\text{L}$  of 0.2 M HAc-NaAc buffer solution (pH 4.0), containing 25  $\mu\text{L}$  of TMB (10  $\text{mg mL}^{-1}$  in DMSO) and different amounts of L-Cys or GSH. After the 5 min incubation under light irradiation ( $\lambda \geq 420 \text{ nm}$ , 100  $\text{mW/cm}^2$ ), the supernatant was collected by centrifugation, and 200  $\mu\text{L}$  of the supernatant was added to the 96-well plate, and the absorption at 652 nm was recorded in a microplate reader. To investigate the selectivity of this systems, water, NaCl,  $\text{Na}_2\text{SO}_4$ , KCl, and some common amino acids were chosen as the interfering substances.

## 8. Catalytic coupling reactions of benzylamines and their derivatives

5 mg CMOFs powder, 0.2  $\mu\text{M}$  benzylamine or its derivatives, 0.2  $\mu\text{M}$  chlorine benzene (internal standard), and 2 mL acetonitrile were added to the quartz glass tube. The glass tube was sealed with a rubber stopper and oxygen bubbling was carried out for 10 minutes. Subsequently, glass tube was placed under blue light (460 nm) illumination for 4 hours. After the reaction was completed, the filtrate was collected and detected by GC and NMR. When conducting the quenching experiment, quenching agents were added additionally to explore the active species in the catalytic process.

## Supplementary Figures

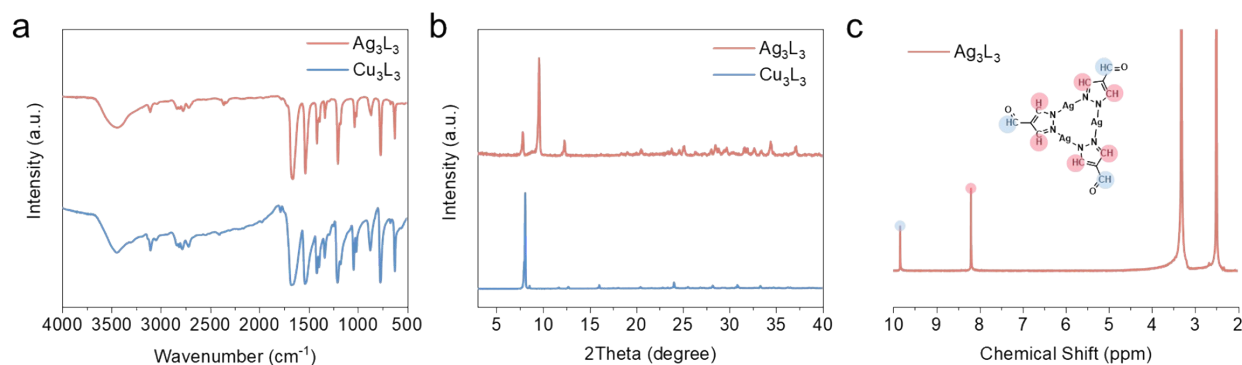

**Fig. S1.** (a) FT-IR spectra, (b) PXRD patterns and (c)  $^1\text{H}$ -NMR spectrum of  $\text{Ag}_3\text{L}_3$  and  $\text{Cu}_3\text{L}_3$ .

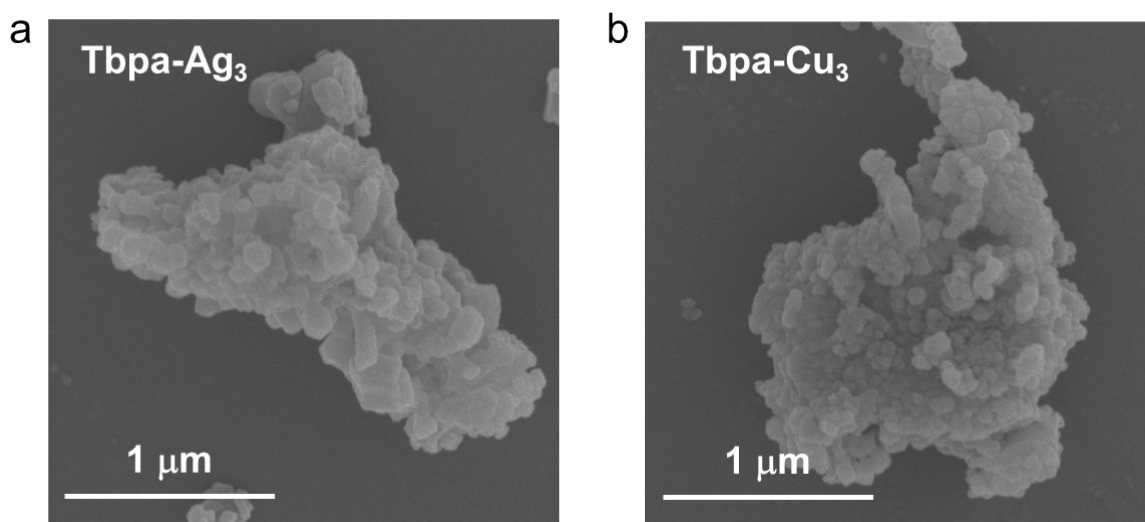

**Fig. S2.** SEM images of (a)  $\text{Tbpa-Ag}_3$  and (b)  $\text{Tbpa-Cu}_3$ .

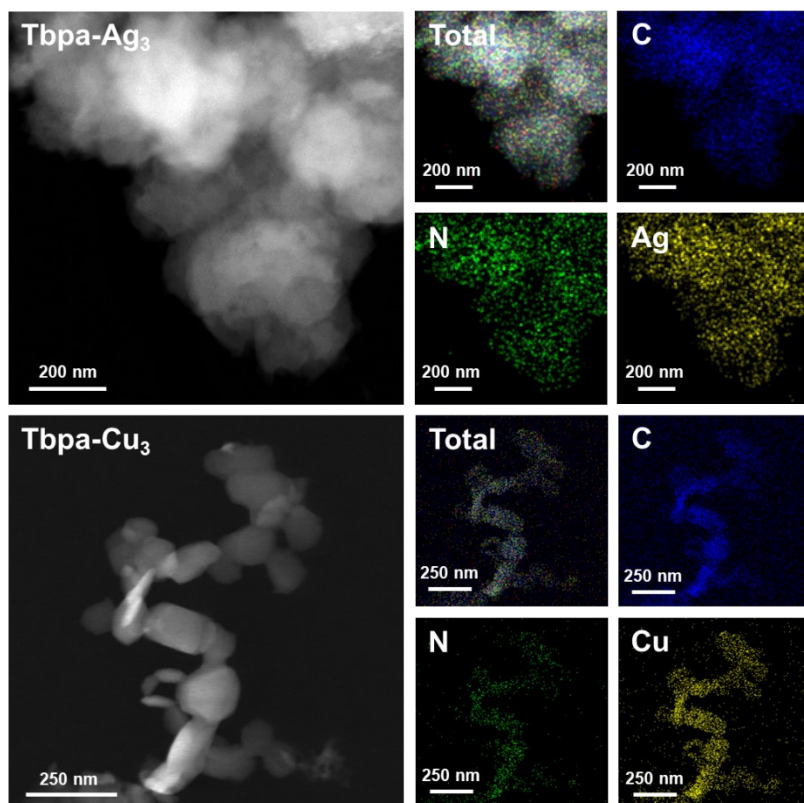

**Fig. S3.** The energy-dispersive X-ray spectroscopy (EDX) mapping images of Tbpa-Ag<sub>3</sub> and Tbpa-Cu<sub>3</sub>.

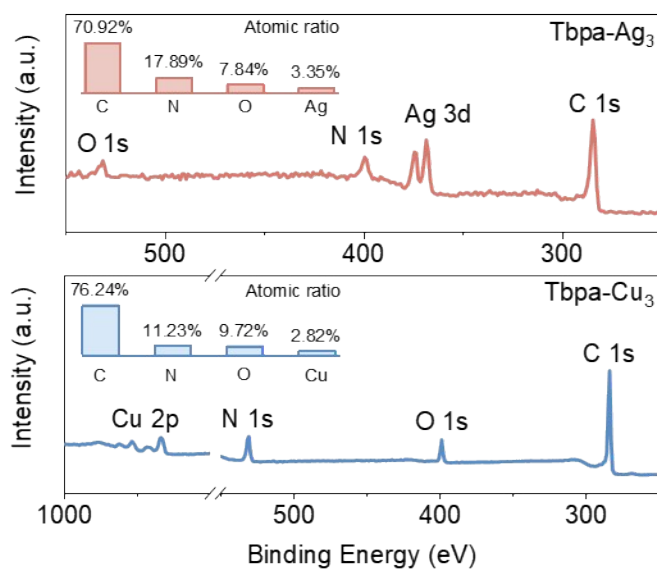

**Fig. S4.** The survey XPS spectrum of two CMOFs.

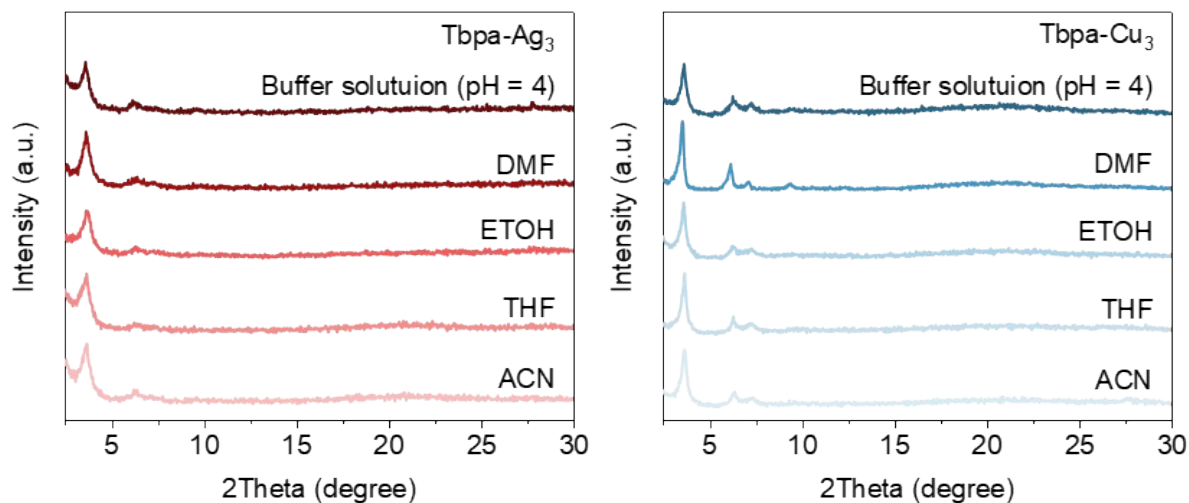

**Fig. S5.** PXRD patterns of the (a) Tbpa-Ag<sub>3</sub> and (b) Tbpa-Cu<sub>3</sub> upon 12 h treatment in different conditions.

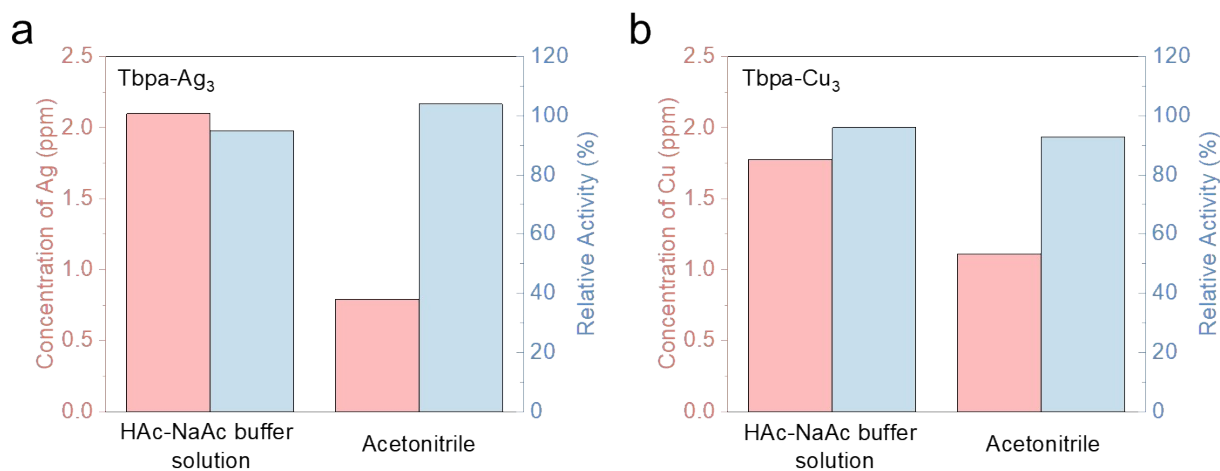

**Fig. S6.** The ionic leaching concentrations of two CMOFs in solution and their relative activities after soaking.



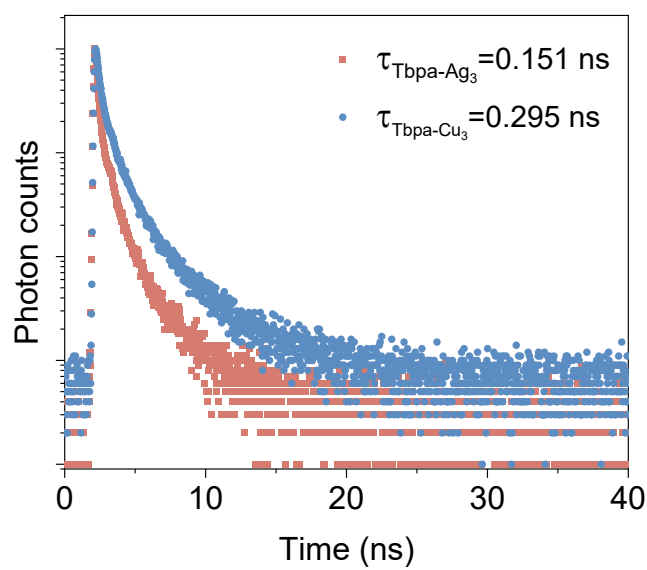

**Fig. S7.** Time-resolved PL spectra of Tbpa-Ag<sub>3</sub> and Tbpa-Cu<sub>3</sub>.

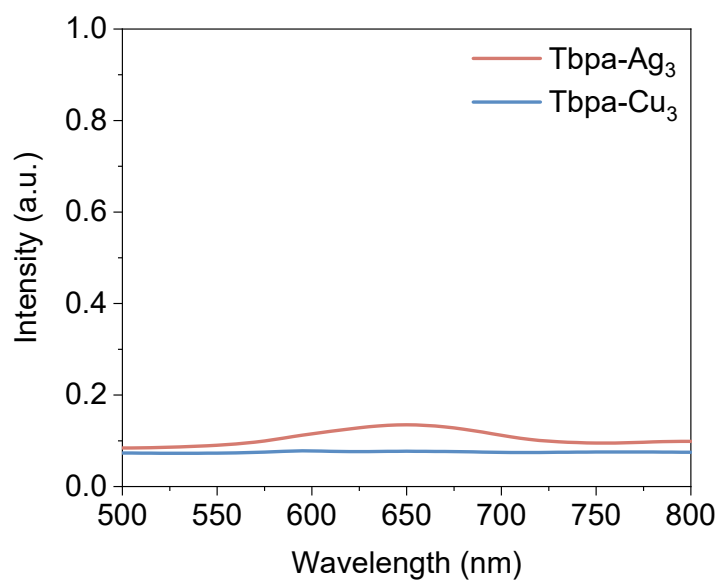

**Fig. S8.** UV-vis absorption spectra of the OXD-like performances for Tbpa-Ag<sub>3</sub> and Tbpa-Cu<sub>3</sub> under darkness.

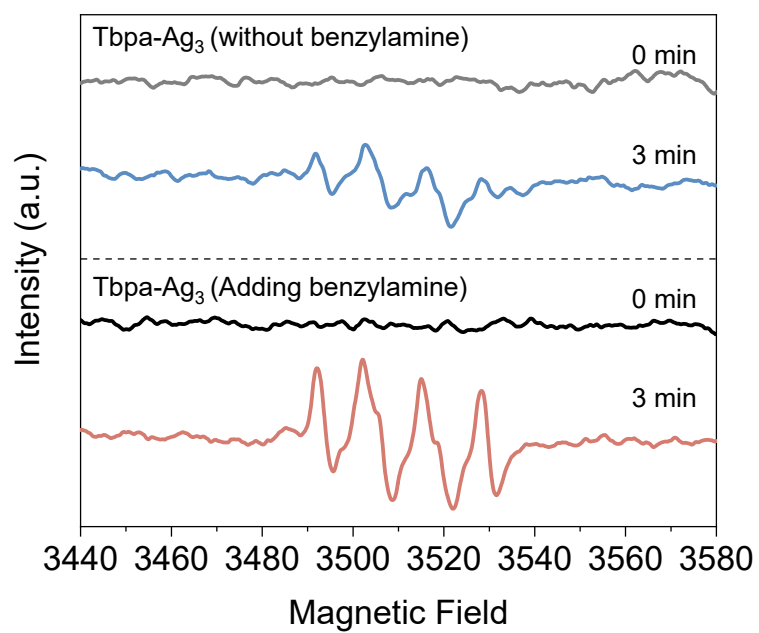

**Fig. S9.** EPR spectra of Tbpa-Ag<sub>3</sub> under different reaction conditions.

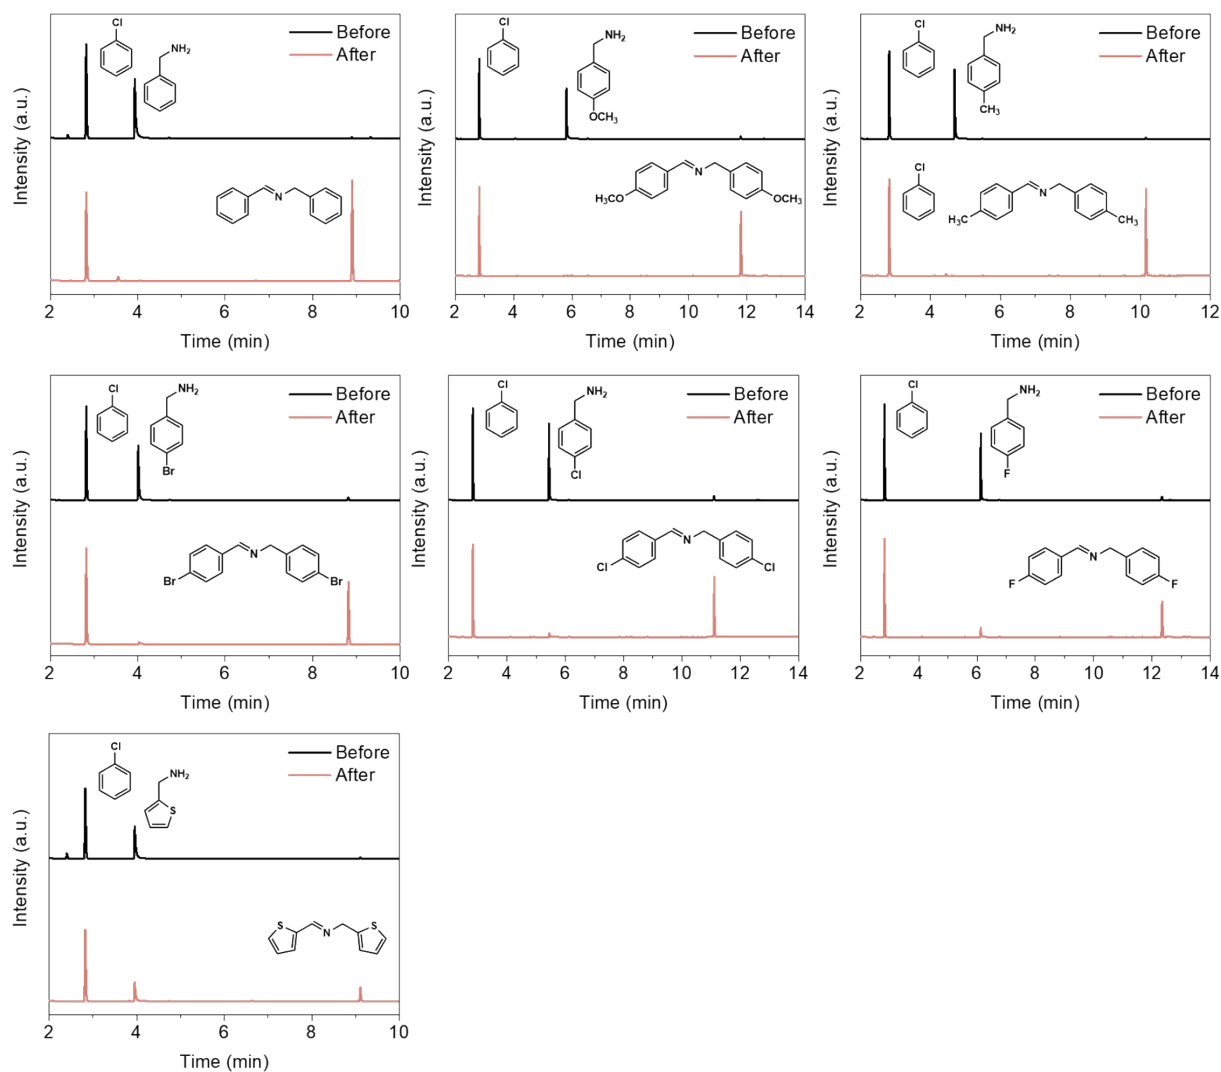

**Fig. S10.** GC data for different substrates before and after catalysis.

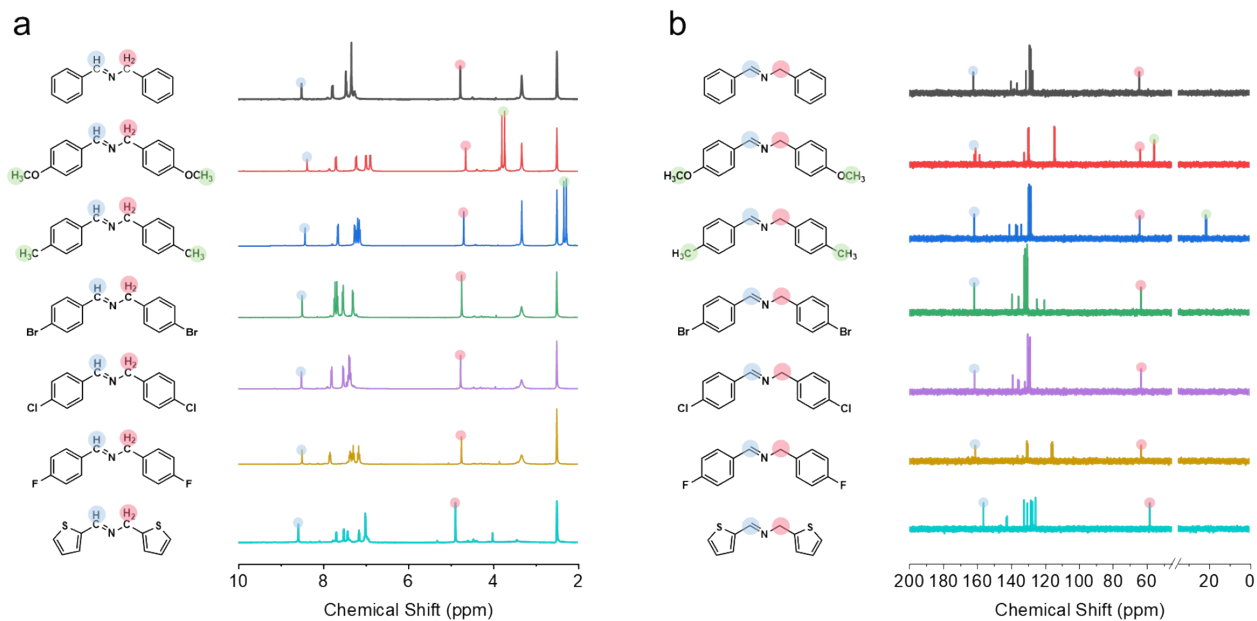

**Fig. S11.**  $^1\text{H}$ -NMR and  $^{13}\text{C}$ -NMR spectra for different substrates after catalysis.

**Table S1.** The structure model of Tbpa-Ag<sub>3</sub> with *P3* mode.

| Tbpa-Ag <sub>3</sub> Space group: Trigonal <i>P3</i><br>$a = b = 28.8283 \text{ \AA}$ , $c = 3.5564 \text{ \AA}$<br>$\alpha = 90.0^\circ$ , $\beta = 90.0^\circ$ , $\gamma = 120.0^\circ$ |         |          |          |
|-------------------------------------------------------------------------------------------------------------------------------------------------------------------------------------------|---------|----------|----------|
| Atom                                                                                                                                                                                      | x       | y        | z        |
| C1                                                                                                                                                                                        | 1.49889 | -0.00458 | -0.0056  |
| C2                                                                                                                                                                                        | 1.55218 | 0.02363  | -0.09121 |
| C3                                                                                                                                                                                        | 1.57946 | 0.07839  | -0.08761 |
| C4                                                                                                                                                                                        | 1.55377 | 0.10599  | 0.00304  |
| C5                                                                                                                                                                                        | 1.50045 | 0.07781  | 0.09269  |
| C6                                                                                                                                                                                        | 1.47323 | 0.02303  | 0.09063  |
| C7                                                                                                                                                                                        | 1.58254 | 0.164    | 0.00514  |
| C8                                                                                                                                                                                        | 1.63227 | 0.19202  | 0.15629  |
| C9                                                                                                                                                                                        | 1.65911 | 0.24675  | 0.16037  |
| C10                                                                                                                                                                                       | 1.63798 | 0.27566  | 0.00722  |
| C11                                                                                                                                                                                       | 1.58801 | 0.24655  | -0.14661 |
| C12                                                                                                                                                                                       | 1.5605  | 0.19181  | -0.14461 |
| N13                                                                                                                                                                                       | 1.47298 | -0.06086 | -0.0112  |
| C14                                                                                                                                                                                       | 1.48447 | 0.57731  | -0.00724 |
| C15                                                                                                                                                                                       | 1.44843 | 0.59803  | -0.01003 |
| C16                                                                                                                                                                                       | 1.46199 | 0.65022  | -0.01077 |
| N17                                                                                                                                                                                       | 1.41758 | 0.65258  | -0.0121  |
| N18                                                                                                                                                                                       | 1.37691 | 0.60446  | -0.01218 |
| C19                                                                                                                                                                                       | 1.3942  | 0.56999  | -0.01095 |
| Ag20                                                                                                                                                                                      | 1.30464 | 0.58992  | -0.01239 |
| H21                                                                                                                                                                                       | 1.57255 | 0.003    | -0.16377 |
| H22                                                                                                                                                                                       | 1.62046 | 0.0992   | -0.16033 |

**Table S2.** The structure model of Tbpa-Cu<sub>3</sub> with *P3* mode.

| Tbpa-Cu <sub>3</sub> Space group: Trigonal <i>P3</i><br>$a = b = 28.9304 \text{ \AA}$ , $c = 3.2208 \text{ \AA}$<br>$\alpha = 90.0^\circ$ , $\beta = 90.0^\circ$ , $\gamma = 120.0^\circ$ |         |          |          |
|-------------------------------------------------------------------------------------------------------------------------------------------------------------------------------------------|---------|----------|----------|
| Atom                                                                                                                                                                                      | x       | y        | z        |
| C1                                                                                                                                                                                        | 1.4989  | -0.00456 | -0.00549 |
| C2                                                                                                                                                                                        | 1.55218 | 0.02363  | -0.09125 |
| C3                                                                                                                                                                                        | 1.57946 | 0.07839  | -0.08801 |
| C4                                                                                                                                                                                        | 1.55378 | 0.106    | 0.00241  |
| C5                                                                                                                                                                                        | 1.50047 | 0.07785  | 0.09217  |
| C6                                                                                                                                                                                        | 1.47325 | 0.02306  | 0.09049  |
| C7                                                                                                                                                                                        | 1.58255 | 0.16402  | 0.00426  |
| C8                                                                                                                                                                                        | 1.63227 | 0.19204  | 0.15544  |
| C9                                                                                                                                                                                        | 1.65912 | 0.24677  | 0.15936  |
| C10                                                                                                                                                                                       | 1.63799 | 0.27567  | 0.00609  |
| C11                                                                                                                                                                                       | 1.58804 | 0.24656  | -0.14776 |
| C12                                                                                                                                                                                       | 1.56054 | 0.19182  | -0.14567 |
| N13                                                                                                                                                                                       | 1.47299 | -0.06084 | -0.0106  |
| C14                                                                                                                                                                                       | 1.48448 | 0.5773   | -0.00635 |
| C15                                                                                                                                                                                       | 1.44844 | 0.59802  | -0.0086  |
| C16                                                                                                                                                                                       | 1.46199 | 0.65022  | -0.00906 |
| N17                                                                                                                                                                                       | 1.41758 | 0.65258  | -0.00993 |
| N18                                                                                                                                                                                       | 1.37691 | 0.60445  | -0.01    |
| C19                                                                                                                                                                                       | 1.3942  | 0.56998  | -0.00922 |
| Cu20                                                                                                                                                                                      | 1.30464 | 0.58991  | -0.00993 |
| H21                                                                                                                                                                                       | 1.57254 | 0.00299  | -0.16361 |
| H22                                                                                                                                                                                       | 1.62045 | 0.09919  | -0.16078 |

**Table S3.** Comparison of the OXD-like catalytic kinetic constants with other reported biocatalysts.

| Biocatalyst          | Substrate | $K_m$ (mM) | $V_{\max}$ (M s <sup>-1</sup> ) | Ref       |
|----------------------|-----------|------------|---------------------------------|-----------|
| Fe-N-C               | TMB       | 1.81       | $6.0 \times 10^{-9}$            | 3         |
| Mn-UMOF              | TMB       | 0.42       | $3.0 \times 10^{-8}$            | 4         |
| Fluorescein          | TMB       | 0.16       | $6.7 \times 10^{-8}$            | 5         |
| CeO <sub>2</sub>     | TMB       | 0.42       | $1.0 \times 10^{-7}$            | 6         |
| MnOOH                | TMB       | 1.00       | $3.3 \times 10^{-7}$            | 7         |
| Pd <sub>12</sub>     | TMB       | 0.24       | $7.1 \times 10^{-8}$            | 8         |
| Tbpa-Ag <sub>3</sub> | TMB       | 0.07       | $2.42 \times 10^{-7}$           | This work |
| Tbpa-Cu <sub>3</sub> | TMB       | 0.11       | $1.24 \times 10^{-7}$           | This work |

**Table S4.** Comparison of the OXD-like catalytic kinetic constants with other reported photo-responsive biocatalysts.

| Biocatalyst          | Substrate | $K_m$ (mM) | $V_{\max}$ (M s <sup>-1</sup> ) | Ref       |
|----------------------|-----------|------------|---------------------------------|-----------|
| Py-TT COF            | TMB       | 0.04       | $5.26 \times 10^{-8}$           | 9         |
| ETTA-Tz COF          | TMB       | 0.22       | $1.8 \times 10^{-7}$            | 10        |
| COF-300-AR           | TMB       | 0.09       | $3.38 \times 10^{-8}$           | 11        |
| TTPA-COF             | TMB       | 0.09       | $2.4 \times 10^{-7}$            | 12        |
| COF-Por-DPP          | TMB       | 0.198      | $4.52 \times 10^{-8}$           | 13        |
| TpBTD                | TMB       | 0.10       | $1.8 \times 10^{-7}$            | 14        |
| Tbpa-Ag <sub>3</sub> | TMB       | 0.07       | $2.42 \times 10^{-7}$           | This work |
| Tbpa-Cu <sub>3</sub> | TMB       | 0.11       | $1.24 \times 10^{-7}$           | This work |

**Table S5.** Performance comparison of Tbpa-Ag<sub>3</sub> with earlier reported biocatalysts in the detection of L-Cys.

| Biocatalysts                     | Linear range (μM) | LOD (μM) | Ref.      |
|----------------------------------|-------------------|----------|-----------|
| Au@NH <sub>2</sub> -MIL-125      | 1-10              | 0.15     | 15        |
| Co-N/C-900                       | 1-40              | 0.033    | 16        |
| Ru@V <sub>2</sub> O <sub>4</sub> | 3-50              | 0.139    | 17        |
| NiCo <sub>2</sub> O <sub>4</sub> | 2-40              | 0.3      | 18        |
| PrOx-NR                          | 0.2-10            | 0.0003   | 19        |
| Tbpa-Ag <sub>3</sub>             | 4-80              | 0.27     | This work |

**Table S6.** Performance comparison of Tbpa-Ag<sub>3</sub> with earlier reported biocatalysts in the detection of GSH.

| Biocatalysts                   | Linear range (μM) | LOD (μM) | Ref.      |
|--------------------------------|-------------------|----------|-----------|
| MnPNP                          | 0.05-10           | 0.022    | 20        |
| Co <sub>3</sub> N-HPC          | 0.05-30           | 0.036    | 21        |
| Mn <sub>3</sub> O <sub>4</sub> | 5-60              | 0.889    | 22        |
| MnO <sub>2</sub>               | 1-25              | 0.3      | 23        |
| TiO <sub>2</sub> /C-QDs        | 0.5-25            | 0.2      | 24        |
| Tbpa-Ag <sub>3</sub>           | 4-70              | 0.19     | This work |

## References

1. Y.-Y. Tang, X. Luo, R.-Q. Xia, J. Luo, S.-K. Peng, Z.-N. Liu, Q. Gao, M. Xie, R.-J. Wei, G.-H. Ning and D. Li, *Angewandte Chemie International Edition*, 2024, **63**, e202408186.
2. R.-J. Wei, H.-G. Zhou, Z.-Y. Zhang, G.-H. Ning and D. Li, *CCS Chemistry*, 2020, **3**, 2045-2053.
3. Y. Wu, L. Jiao, X. Luo, W. Xu, X. Wei, H. Wang, H. Yan, W. Gu, B. Z. Xu, D. Du, Y. Lin and C. Zhu, *Small*, 2019, **15**, 1903108.
4. A. K. Singh, K. Bijalwan, N. Kaushal, A. Kumari, A. Saha and A. Indra, *ACS Applied Nano Materials*, 2023, **6**, 8036-8045.
5. L. Liu, C. Sun, J. Yang, Y. Shi, Y. Long and H. Zheng, *Chemistry - A European Journal*, 2018, **24**, 6148-6154.
6. H. Cheng, S. Lin, F. Muhammad, Y.-W. Lin and H. Wei, *ACS Sensors*, 2016, **1**, 1336-1343.
7. L. Yu, H. Li, W. Huang, H. Yu and Y. He, *Inorganic Chemistry*, 2021, **60**, 5264-5270.
8. S. Bhattacharyya, S. R. Ali, M. Venkateswarulu, P. Howlader, E. Zangrando, M. De and P. S. Mukherjee, *Journal of the American Chemical Society*, 2020, **142**, 18981-18989.
9. G. Li, W. Ma, Y. Yang, C. Zhong, H. Huang, D. Ouyang, Y. He, W. Tian, J. Lin and Z. Lin, *ACS Applied Materials & Interfaces*, 2021, **13**,



49482-49489.

10. G. Li, W. Tian, C. Zhong, Y. Yang and Z. Lin, *ACS Applied Materials & Interfaces*, 2022, **14**, 21750-21757.
11. P. Jin, X. Niu, F. Zhang, K. Dong, H. Dai, H. Zhang, W. Wang, H. Chen and X. Chen, *ACS Applied Materials & Interfaces*, 2020, **12**, 20414-20422.
12. Y. Peng, M. Huang, L. Chen, C. Gong, N. Li, Y. Huang and C. Cheng, *Nano Research*, 2022, **15**, 8783-8790.
13. W. Yao, L. Yao, Z.-E. Wang, X. Song and Z. Liang, *Talanta*, 2025, **286**, 127519.
14. L. Liang, Y. Jiang, F. Liu, J. Wu, L. Tian, S. Zhao and F. Ye, *Sensors and Actuators B: Chemical*, 2023, **381**, 133422.
15. Y. Zhang, J. Song, W. Shao and J. Li, *Microporous and Mesoporous Materials*, 2021, **310**, 110642.
16. J. Chen, S. Hu, Y. Cai, X. Liu, Y. Wu, Y. Dai and Z. Wang, *Analyst*, 2022, **147**, 915-922.
17. J. Hou, P. Jia, K. Yang, T. Bu, X. Sun and L. Wang, *Sensors and Actuators B: Chemical*, 2021, **344**, 130266.
18. S.-W. Lv, N. Zhao, J.-M. Liu, F.-E. Yang, C.-Y. Li and S. Wang, *ACS Applied Materials & Interfaces*, 2021, **13**, 25044-25052.
19. L. Jiang, Y. Han, S. Fernández-García, M. Tinoco, Z. Li, P. Nan, J. Sun, J. J. Delgado, H. Pan, G. Blanco, J. Martínez-López, A. B. Hungria, J. J. Calvino and X. Chen, *Applied Surface Science*, 2023, **610**, 155502.
20. N. K. Dega, A. B. Ganganboina, H. L. Tran, E. P. Kuncoro and R.-a. Doong, *Talanta*, 2022, **237**, 122957.
21. S. Li, L. Wang, X. Zhang, H. Chai and Y. Huang, *Sensors and Actuators B: Chemical*, 2018, **264**, 312-319.
22. J. Xi, C. Zhu, Y. Wang, Q. Zhang and L. Fan, *RSC Advances*, 2019, **9**, 16509-16514.
23. J. Liu, L. Meng, Z. Fei, P. J. Dyson, X. Jing and X. Liu, *Biosensors and Bioelectronics*, 2017, **90**, 69-74.
24. Z. Jin, G. Xu, Y. Niu, X. Ding, Y. Han, W. Kong, Y. Fang, H. Niu and Y. Xu, *Journal of Materials Chemistry B*, 2020, **8**, 3513-3518.
